# Supplementary material for: Multivariate Analysis of Confined Groundwater Hydrochemistry of a Long-Exploited Sedimentary Basin in Northwest China
Source: Hindawi journal article supplement (doi:10.1155/2016/3812125), 2016-01-01
Supplement: f1 [file 3812125.f1.pdf]

on the Helan leaning pluvial plain could be used to increase artificial recharge of the groundwater system.

## Acknowledgments

This research was supported by the Doctor Postgraduate Technical Project of Chang'an University (2013G5290003) and the National Natural Science Foundation of China (41172212). The authors would like to acknowledge the anonymous reviewers for their critical review of the manuscript and suggestions for further improvements.

## Appendix A. Supplementary data

**Table A1.** General information of samples.

| Samples | pH   | TH   | TDS  | Ca <sup>2+</sup> | Mg <sup>2+</sup> | K <sup>+</sup> | Na <sup>+</sup> | Cl <sup>-</sup> | SO <sub>4</sub> <sup>2-</sup> | HCO <sub>3</sub> <sup>-</sup> | NO <sub>3</sub> <sup>-</sup> | NH <sub>4</sub> <sup>+</sup> | F <sup>-</sup> |
|---------|------|------|------|------------------|------------------|----------------|-----------------|-----------------|-------------------------------|-------------------------------|------------------------------|------------------------------|----------------|
| C01     | 8.06 | 227  | 715  | 38.4             | 37.25            | 2              | 168.1           | 135.75          | 174.65                        | 282.83                        | 0                            | 0                            | 0.4            |
| C02     | 8.1  | 224  | 680  | 48               | 26.77            | 1.5            | 161.4           | 129.13          | 154.69                        | 282.83                        | 0                            | 0                            | 0.5            |
| C03     | 8.07 | 315  | 796  | 65.28            | 39.58            | 2              | 168.1           | 218.53          | 162.34                        | 245.12                        | 0.23                         | 0.93                         | 0.2            |
| C04     | 8.11 | 296  | 462  | 55.68            | 43.07            | 2.5            | 46.2            | 69.53           | 97.49                         | 263.97                        | 0                            | 0                            | 0.2            |
| C05     | 8.07 | 190  | 361  | 19.2             | 44.23            | 1.5            | 52.8            | 39.73           | 43.67                         | 289.11                        | 0                            | 0.38                         | 0.2            |
| C06     | 8.09 | 178  | 308  | 11.52            | 47.72            | 2              | 34.2            | 26.49           | 32.4                          | 276.54                        | 0.23                         | 0.03                         | 0.16           |
| C07     | 8.41 | 226  | 324  | 34.74            | 40.74            | 2              | 27.2            | 26.49           | 30.12                         | 282.83                        | 0                            | 0                            | 0.1            |
| C08     | 8.1  | 215  | 315  | 40.32            | 31.43            | 2              | 32              | 29.8            | 23.49                         | 282.83                        | 0.34                         | 0                            | 0.1            |
| C09     | 8.43 | 260  | 376  | 46.08            | 40.74            | 2.5            | 33.6            | 29.8            | 51.23                         | 289.11                        | 0                            | 0                            | 0.1            |
| C10     | 8.1  | 306  | 501  | 51.84            | 50.05            | 3.5            | 56.8            | 69.53           | 95.32                         | 314.25                        | 0                            | 0                            | 0.1            |
| C11     | 8.08 | 223  | 345  | 38.4             | 36.08            | 3              | 33              | 33.11           | 61.69                         | 245.12                        | 2.26                         | 0                            | 0.1            |
| C12     | 8.41 | 204  | 327  | 36.48            | 31.43            | 2              | 39.2            | 26.49           | 38.79                         | 251.4                         | 0                            | 0                            | 0.2            |
| C13     | 8.41 | 256  | 368  | 42.24            | 43.07            | 2              | 29.3            | 26.49           | 64.52                         | 263.97                        | 0                            | 0                            | 0.16           |
| C14     | 8.42 | 236  | 350  | 40.32            | 38.41            | 2              | 32              | 23.18           | 60.24                         | 251.4                         | 0.11                         | 0                            | 0.1            |
| C15     | 8.42 | 206  | 307  | 38.4             | 30.26            | 2              | 33.3            | 23.18           | 17.65                         | 270.26                        | 0.23                         | 0                            | 0.2            |
| C16     | 8.42 | 227  | 347  | 32.64            | 43.07            | 1.5            | 33.6            | 26.49           | 53.21                         | 257.69                        | 0                            | 0                            | 0.1            |
| C17     | 8.4  | 219  | 361  | 34.56            | 38.41            | 2              | 39.2            | 19.87           | 81.67                         | 245.12                        | 0                            | 0                            | 0.2            |
| C18     | 8.09 | 221  | 682  | 42.24            | 31.43            | 1.5            | 161.4           | 149             | 154.32                        | 251.4                         | 0                            | 0                            | 0.3            |
| C19     | 8.42 | 189  | 440  | 26.88            | 36.08            | 2              | 81.5            | 69.53           | 82.31                         | 213.69                        | 0                            | 0                            | 0.2            |
| C20     | 8.41 | 221  | 546  | 42.24            | 31.43            | 1.5            | 117.3           | 69.53           | 95.67                         | 320.54                        | 0                            | 0                            | 0.4            |
| C21     | 8.41 | 129  | 353  | 17.28            | 25.61            | 1              | 79              | 26.49           | 46.87                         | 270.26                        | 0                            | 0                            | 0.5            |
| C22     | 8.1  | 242  | 524  | 74.88            | 5.82             | 1.5            | 109.2           | 72.84           | 95.46                         | 295.4                         | 0                            | 0                            | 0.4            |
| C23     | 8.11 | 192  | 448  | 38.4             | 25.61            | 2              | 88              | 52.98           | 92.54                         | 263.97                        | 0                            | 0                            | 0.7            |
| C24     | 8.09 | 196  | 340  | 38.4             | 26.77            | 1              | 49              | 19.87           | 51.29                         | 276.54                        | 0.34                         | 0                            | 0.16           |
| C25     | 8.08 | 146  | 320  | 23.04            | 25.61            | 1              | 58.4            | 19.87           | 51.23                         | 251.4                         | 0                            | 0                            | 0.2            |
| C26     | 8.1  | 337  | 553  | 63.36            | 48.89            | 1.5            | 68              | 59.6            | 106.58                        | 377.1                         | 0                            | 0                            | 0.1            |
| C27     | 8.11 | 399  | 799  | 59.52            | 73.33            | 2.5            | 128.8           | 115.89          | 158.97                        | 483.95                        | 0                            | 0                            | 0.1            |
| C28     | 8.1  | 389  | 623  | 80.64            | 48.89            | 2              | 76              | 66.22           | 125.46                        | 414.81                        | 0                            | 0                            | 0.1            |
| C29     | 8.12 | 441  | 726  | 86.4             | 60.53            | 3.5            | 90.3            | 99.33           | 154.67                        | 427.38                        | 0                            | 0                            | 0.1            |
| C30     | 8.07 | 189  | 417  | 38.4             | 24.44            | 2              | 76              | 59.6            | 103.6                         | 194.84                        | 0                            | 0.31                         | 0.3            |
| C31     | 8.02 | 1016 | 2222 | 230.4            | 108.25           | 5              | 388             | 807.88          | 613.65                        | 87.99                         | 0                            | 1.32                         | 0.2            |
| C32     | 8.07 | 307  | 736  | 94.08            | 8.15             | 2              | 168.1           | 258.26          | 68.71                         | 238.83                        | 0                            | 0                            | 0.3            |
| C33     | 8.41 | 217  | 351  | 21.12            | 51.22            | 2              | 34.5            | 36.42           | 50.12                         | 257.69                        | 0                            | 0                            | 0.2            |

## References
